# Supplementary material
Source: PubMed Central journal article supplement (PMC9797949)
Supplement: mmc1.pdf [file mmc1.pdf]

**Cell Reports Medicine, Volume 3**

**Supplemental information**

**Tfh cells and the germinal center are  
required for memory B cell formation & humoral  
immunity after ChAdOx1 nCoV-19 vaccination**

**William S. Foster, Jia Le Lee, Nazia Thakur, Joseph Newman, Alexandra J. Spencer, Sophie Davies, Danielle Woods, Leila Godfrey, Iain M. Hay, Silvia Innocentin, Juan Carlos Yam-Puc, Emily C. Horner, Hayley J. Sharpe, James E. Thaventhiran, Dalan Bailey, Teresa Lambe, and Michelle A. Linterman**

**Supplementary Figure 1**

**A**

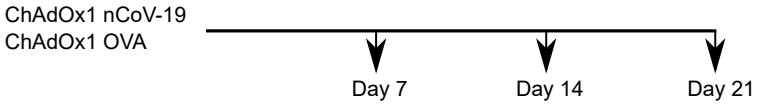

**B**

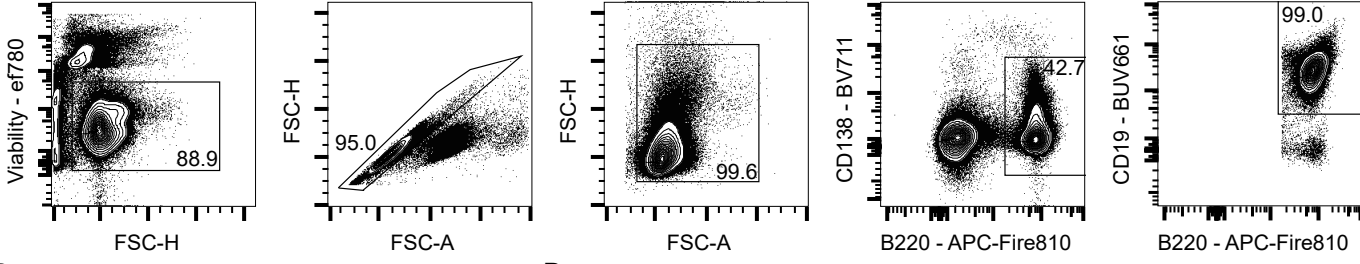

**C**

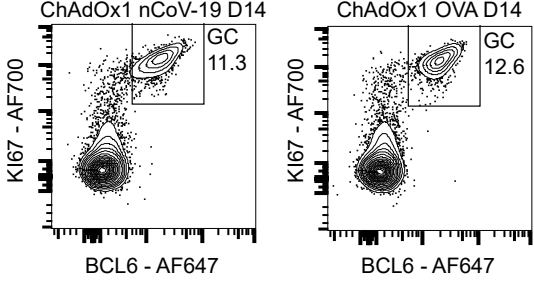

**D**

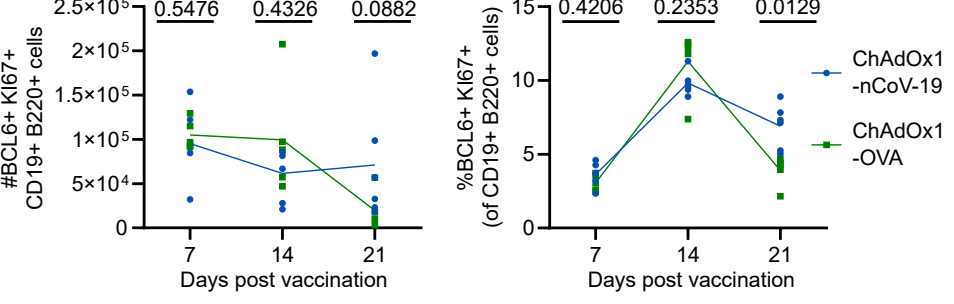

**E**

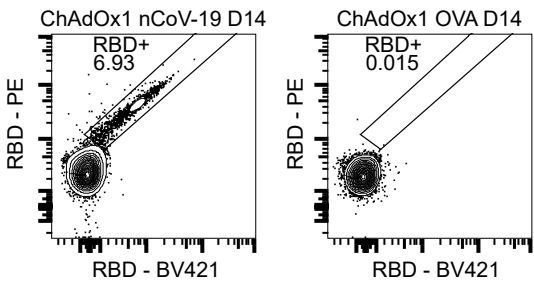

**F**

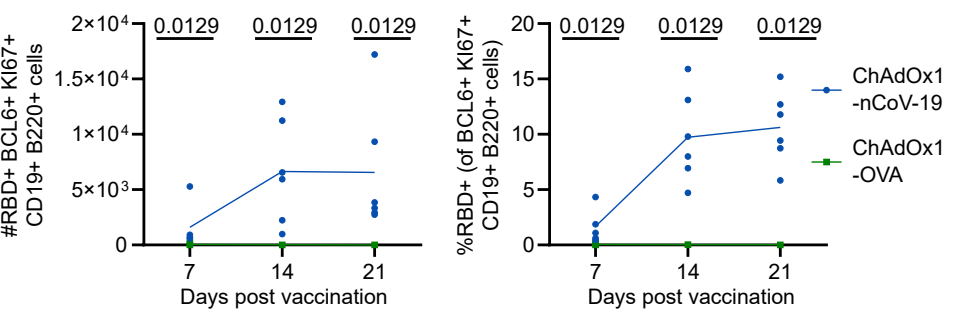

**Supplementary Figure 1 - ChAdOx1 nCoV-19 elicits an RBD-specific GC response. Related to Figure 1.**

**(A)** Mice were immunised with 50 $\mu$ L of either ChAdOx1 nCoV-19 or ChAdOx1 OVA intramuscularly, with mLN being analysed at indicated timepoints. **(B)** Median flow cytometry gating to define live, single, B cells. **(C)** Median flow cytometry plots for GC B cell staining, pre-gated on live, single, CD19+ B220+ cells. **(D)** Total number and relative frequency of GC B cells after immunisation. **(E)** Median flow cytometry plots for RBD+ GC B cells, pre-gated on live single, CD19+ B220+, BCL6+ KI67+ cells. **(F)** Total number and relative frequency of RBD+ GC B cells after immunisation. For each timepoint and condition, n=5 or 6 per group, with each symbol representing a single biological replicate. For **(D and F)** Multiple Mann-Whitney tests per row were used, with P-values corrected for multiple comparison analysis with the Holm-Šidák method. Data representative of two individual experiments.

**Supplementary Figure 2**

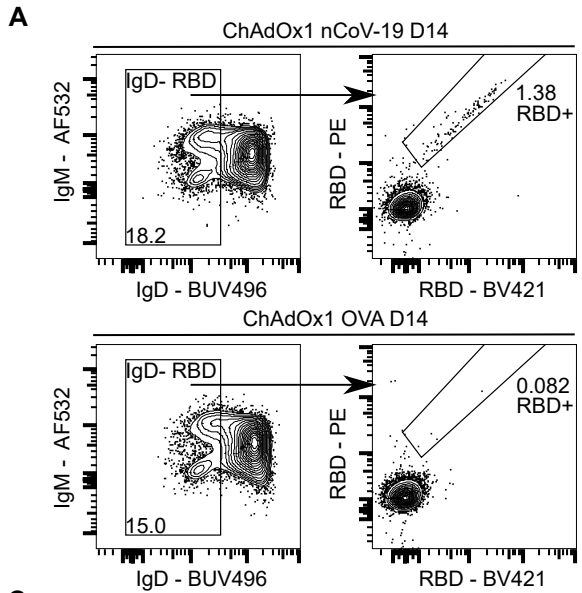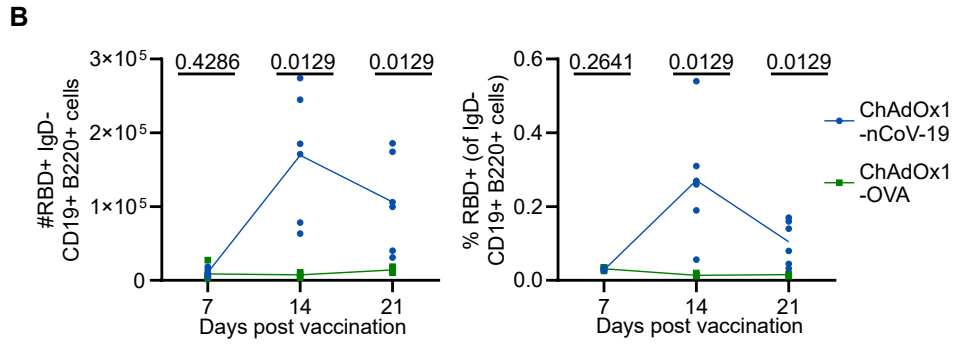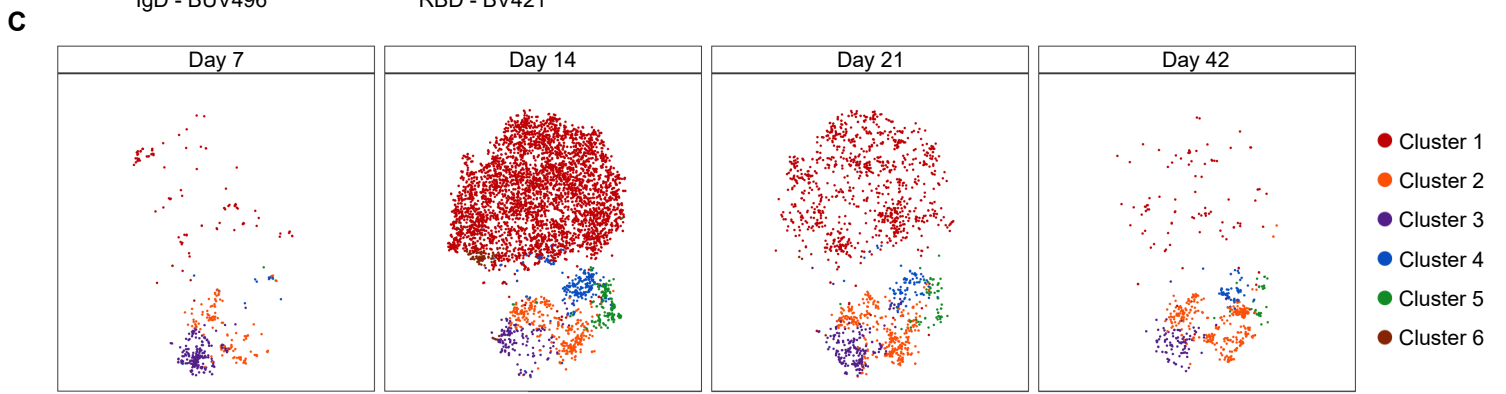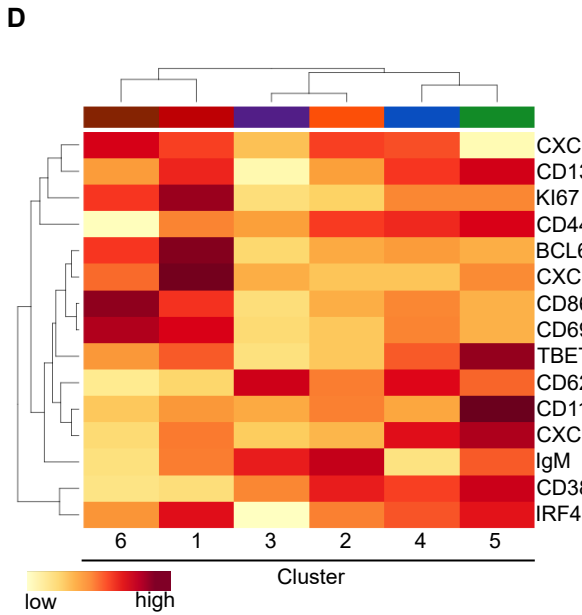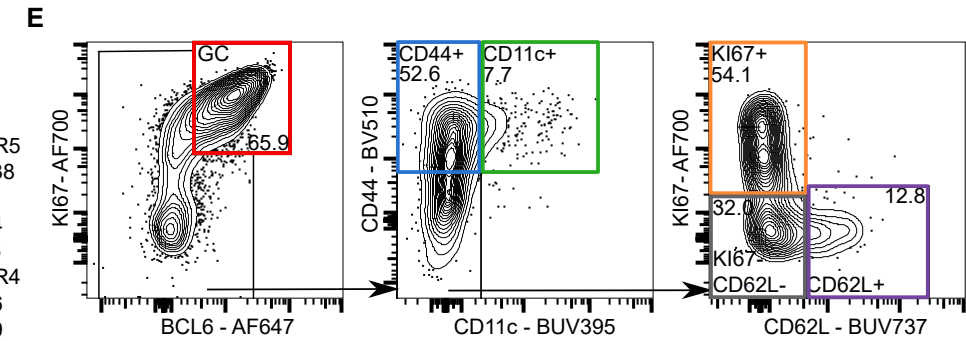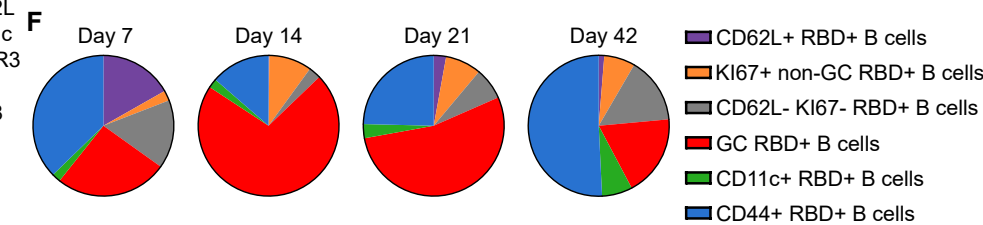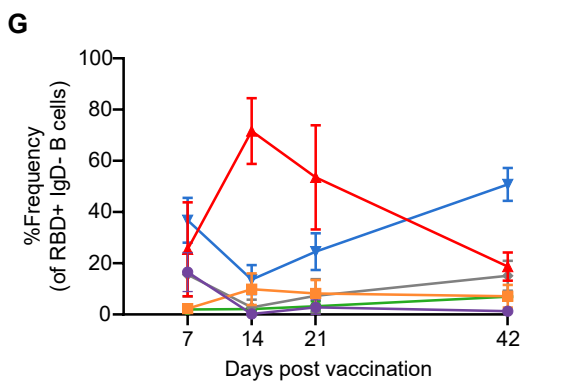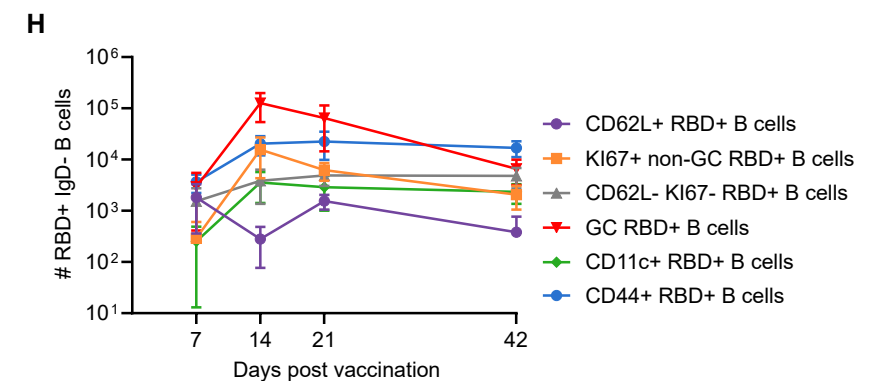

**Supplementary Figure 2 - ChAdOx1 nCoV-19 immunisation generates a mix of RBD-specific GC and memory B cells in the spleen. Related to Figure 1.**

**(A)** Median flow cytometry plots for IgD- RBD+ Spleen B cell staining, pre-gated on live, single, CD19+ B220+ cells. **(B)** Total number and relative frequency of IgD- RBD+ B cells. **(C)** tSNE analysis of IgD- RBD+ B cells separated by timepoint. FlowSOM analysis was used to identify 6 clusters of cells. **(D)** Heatmap showing mean MFI of each marker used in **C** for clustering analysis. **(E)** Flow cytometry gating of 6 IgD- RBD+ sub-populations based on a concatenated sample of all IgD- RBD+ B cells shown in **C**. **(F)** Pie charts showing relative frequency of sub-populations identified in **E**. for each of the 4 timepoints. **(G-H)** Line graphs showing relative frequency **(G)** and quantification **(H)** of sub-populations identified in **E**. Error bars show mean and standard deviation. For each timepoint and condition, n=5 or 6 per group. For **(B)** Multiple Mann-Whitney tests per row were used, with P-values corrected for multiple comparison analysis with the Holm-Šídák method. Data representative of two individual experiments.

### Supplementary Figure 3

**A**

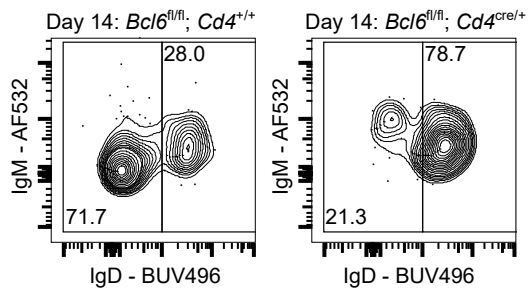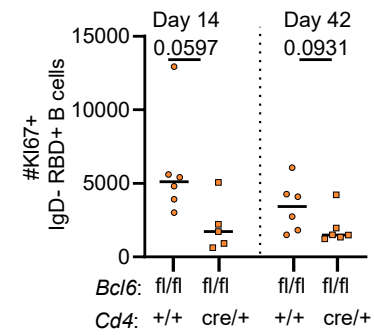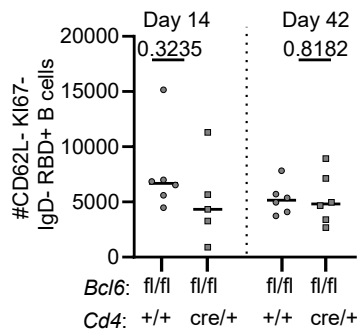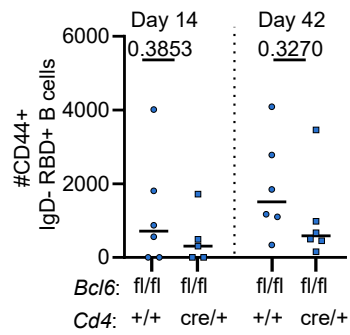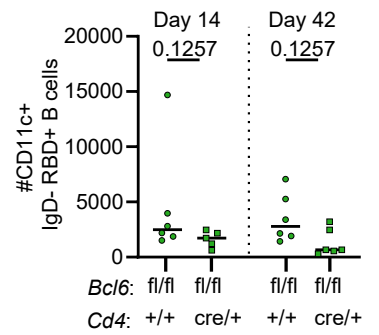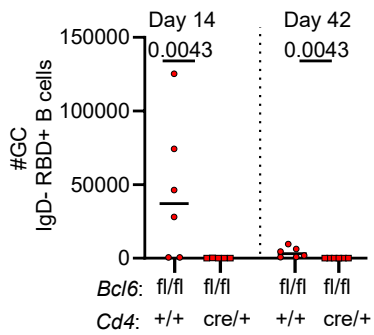

**B**

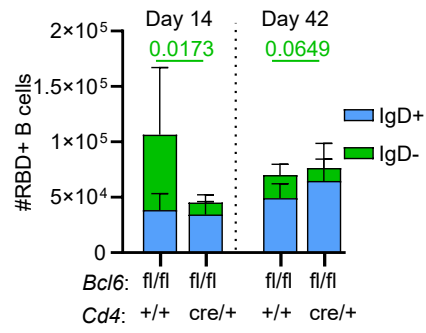

**C**

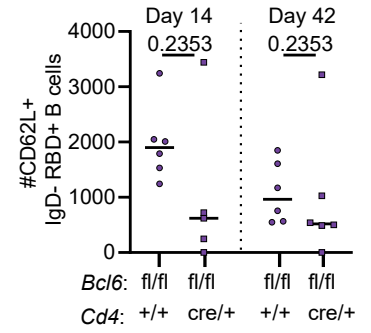

**Supplementary Figure 3 – The spleen contains Tfh cell independent IgD- RBD+ memory B cells after ChAdOx1 nCoV-19 immunisation. Related to Figure 3.**

**(A)** Day 14 median flow cytometry plots for IgD staining of spleen RBD+ B cells, pre-gated on live, single, CD19+ B220+, RBD+ cells. **(B)** Total number of RBD+ B cells at indicated timepoint. p-value shown is from comparison of the number of IgD-RBD+ cells, bar height shows the mean, and the error bars the standard deviation. **(C)** IgD- RBD+ B cell subsets were enumerated using the gating strategy as shown in Figure 2E. For each timepoint and condition, n=4-6 respectively per group. For **(B and C)** multiple Mann-Whitney tests per row were used, with P-values corrected for multiple comparison analysis with the Holm-Šídák method. In dot plots, each symbol represents a biological replicate and the bar height the mean. Data representative of two individual experiments.

Supplementary Figure 4

A

*S1pr2*<sup>ERT2cre/+</sup> *Rosa26*<sup>stop-flox-RFP</sup>

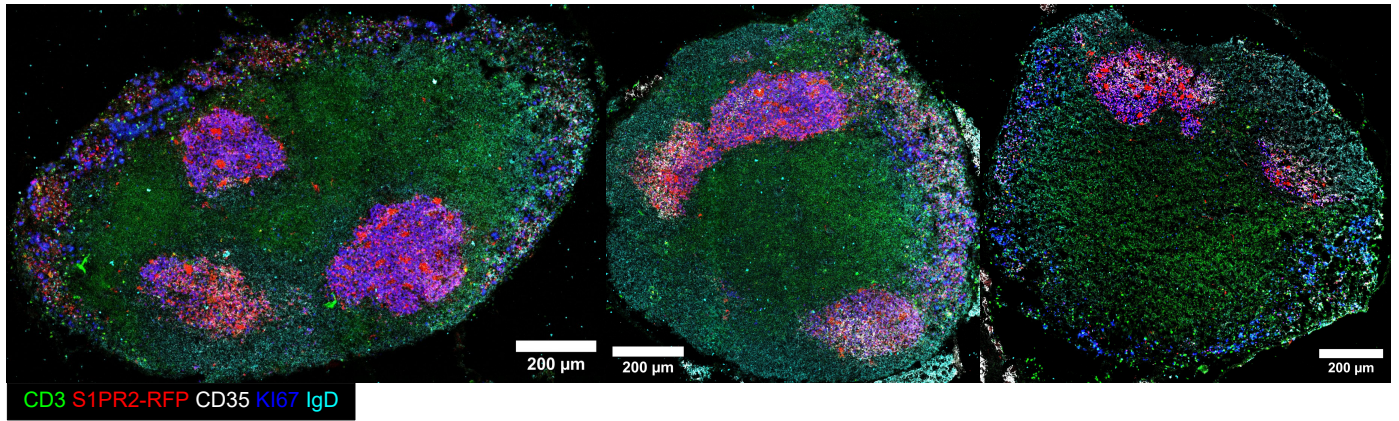

B

*S1pr2*<sup>+/+</sup> *Rosa26*<sup>stop-flox-RFP</sup>

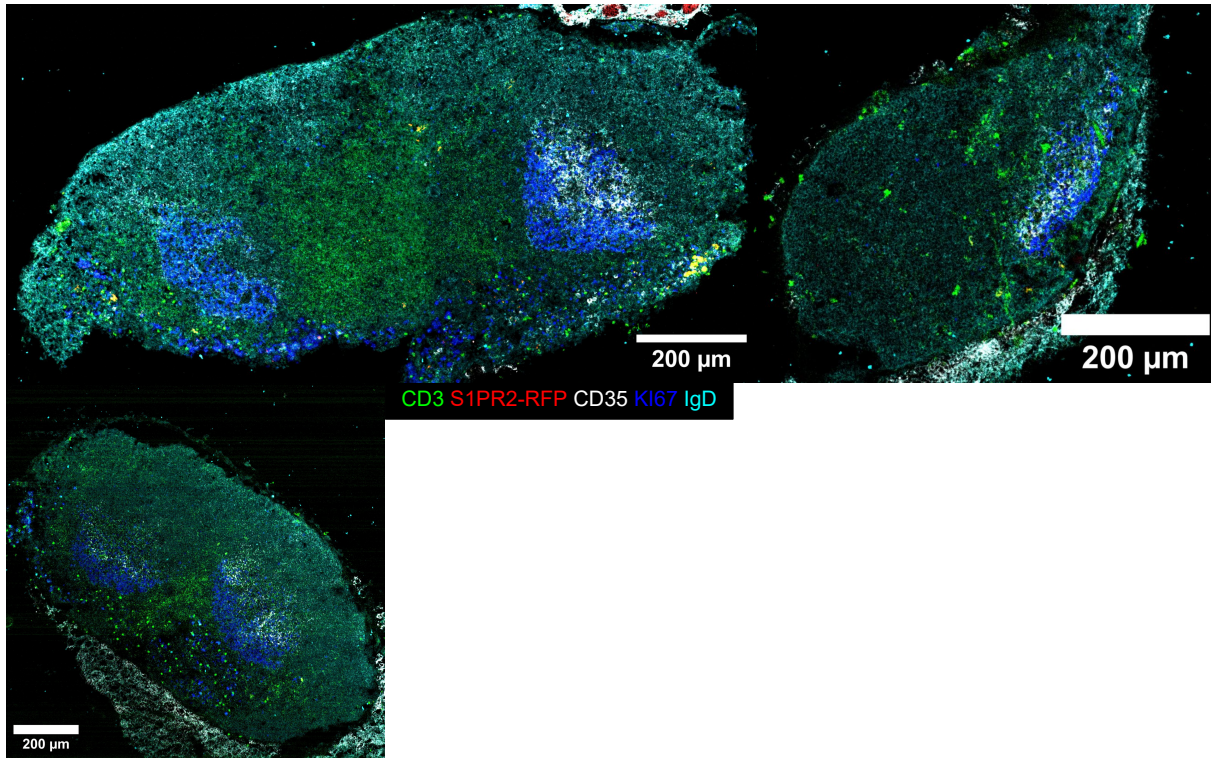



**Supplementary Figure 4 – S1PR2-RFP labelled lymphocytes localise to secondary lymphoid follicles.  
Related to Figure 3.**

**(A)** Day 14 confocal microscopy of whole mLNs from *S1pr2*<sup>ERT2-cre</sup> *Rosa26*<sup>stop-flox-RFP</sup> mice. **(B)** Day 14 confocal microscopy of whole mLNs from *S1pr2*<sup>+/+</sup> *Rosa26*<sup>stop-flox-RFP</sup> mice.

Supplementary Figure 5

A

*Bcl6<sup>fl/fl</sup> Cd23<sup>+/+</sup>*

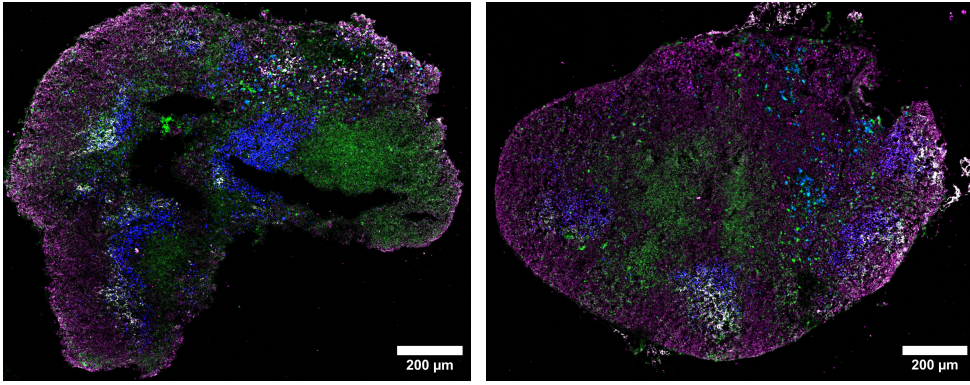

CD3  
CD35  
KI67  
IgD

B

*Bcl6<sup>fl/fl</sup> Cd23<sup>cre/+</sup>*

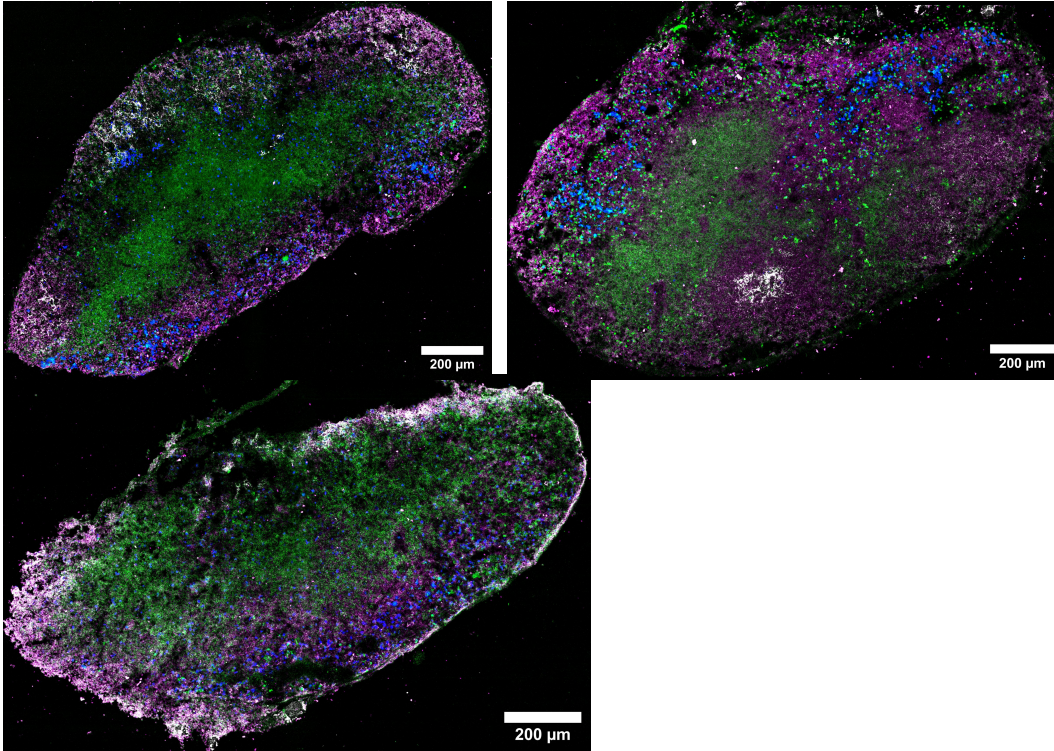

CD3  
CD35  
KI67  
IgD

**Supplementary Figure 5 - *Cd23<sup>cre/+</sup>; Bcl6<sup>fl/fl</sup>* mice have disorganised lymph node secondary follicles. Related to Figure 5.**

**(A)** Day 14 confocal microscopy of whole mLNs from *Cd23<sup>+/+</sup>; Bcl6<sup>fl/fl</sup>* mice. **(B)** Day 14 confocal microscopy of whole mLNs from *Cd23<sup>cre/+</sup>; Bcl6<sup>fl/fl</sup>* mice.

# Supplementary Figure 6

**A**

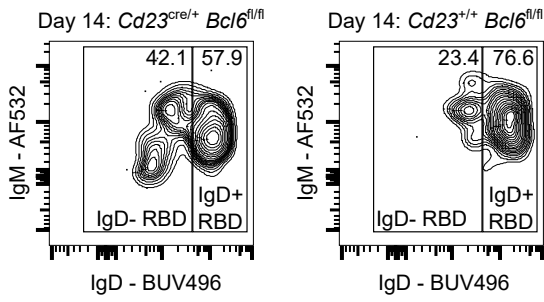

**B**

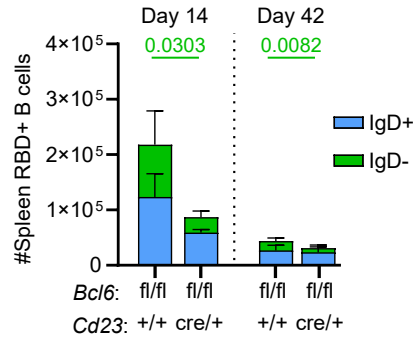

**C**

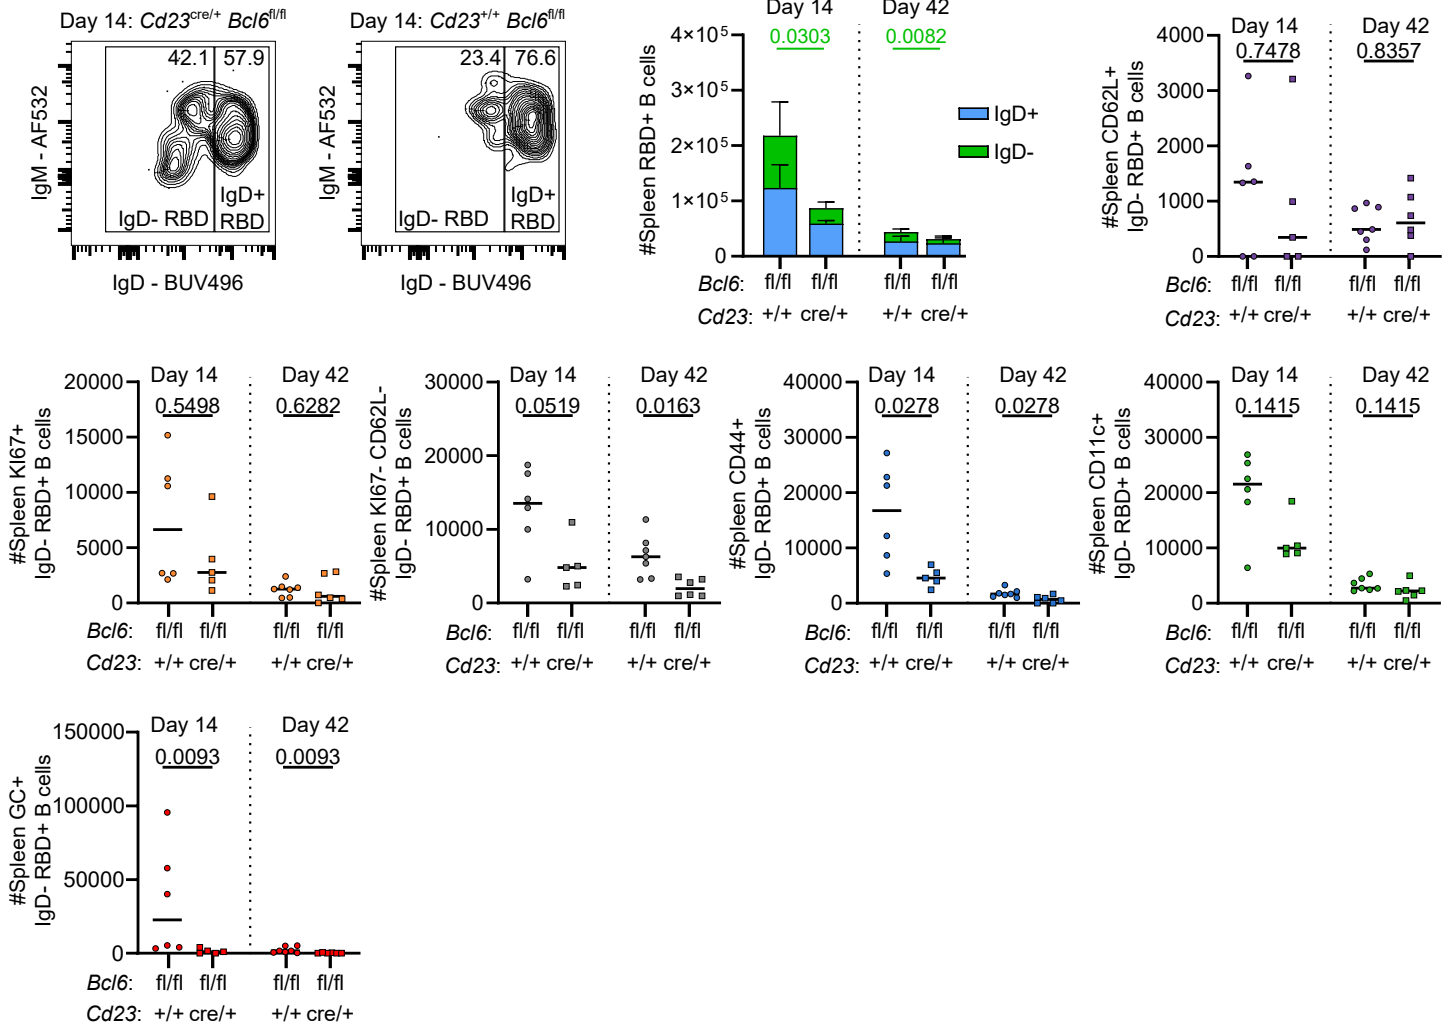

**Supplementary Figure 6 – GC B cells are required for splenic CD44<sup>+</sup> RBD-specific memory B cell formation. Related to Figure 6.**

**(A)** Day 14 median flow cytometry plots for IgD staining of spleen RBD<sup>+</sup> B cells, pre-gated on live, single, CD19<sup>+</sup> B220<sup>+</sup>, RBD<sup>+</sup> cells. **(B)** Total number of RBD<sup>+</sup> B cells at indicated timepoint, p-value shown is from comparison of the number of IgD<sup>-</sup> RBD<sup>+</sup> cells, bar height shows the mean, and the error bars the standard deviation. **(C)** IgD<sup>-</sup> RBD<sup>+</sup> B cell subsets were enumerated using the gating strategy as shown in Supplementary Figure 2E. For **(B and C)** multiple Mann-Whitney tests per row were used, with P-values corrected for multiple comparison analysis with the Holm-Šídák method. In dot plots, each symbol represents a biological replicate and the bar height the mean. Data representative of two individual experiments.
